# Supplementary material
Source: publisher figshare collection journal article supplement (https://frontiersin.figshare.com/ndownloader/files/23582963)
Supplement: Supplementary file [file 23582963]

## Line-up Image Positioning – Supplemental Material B

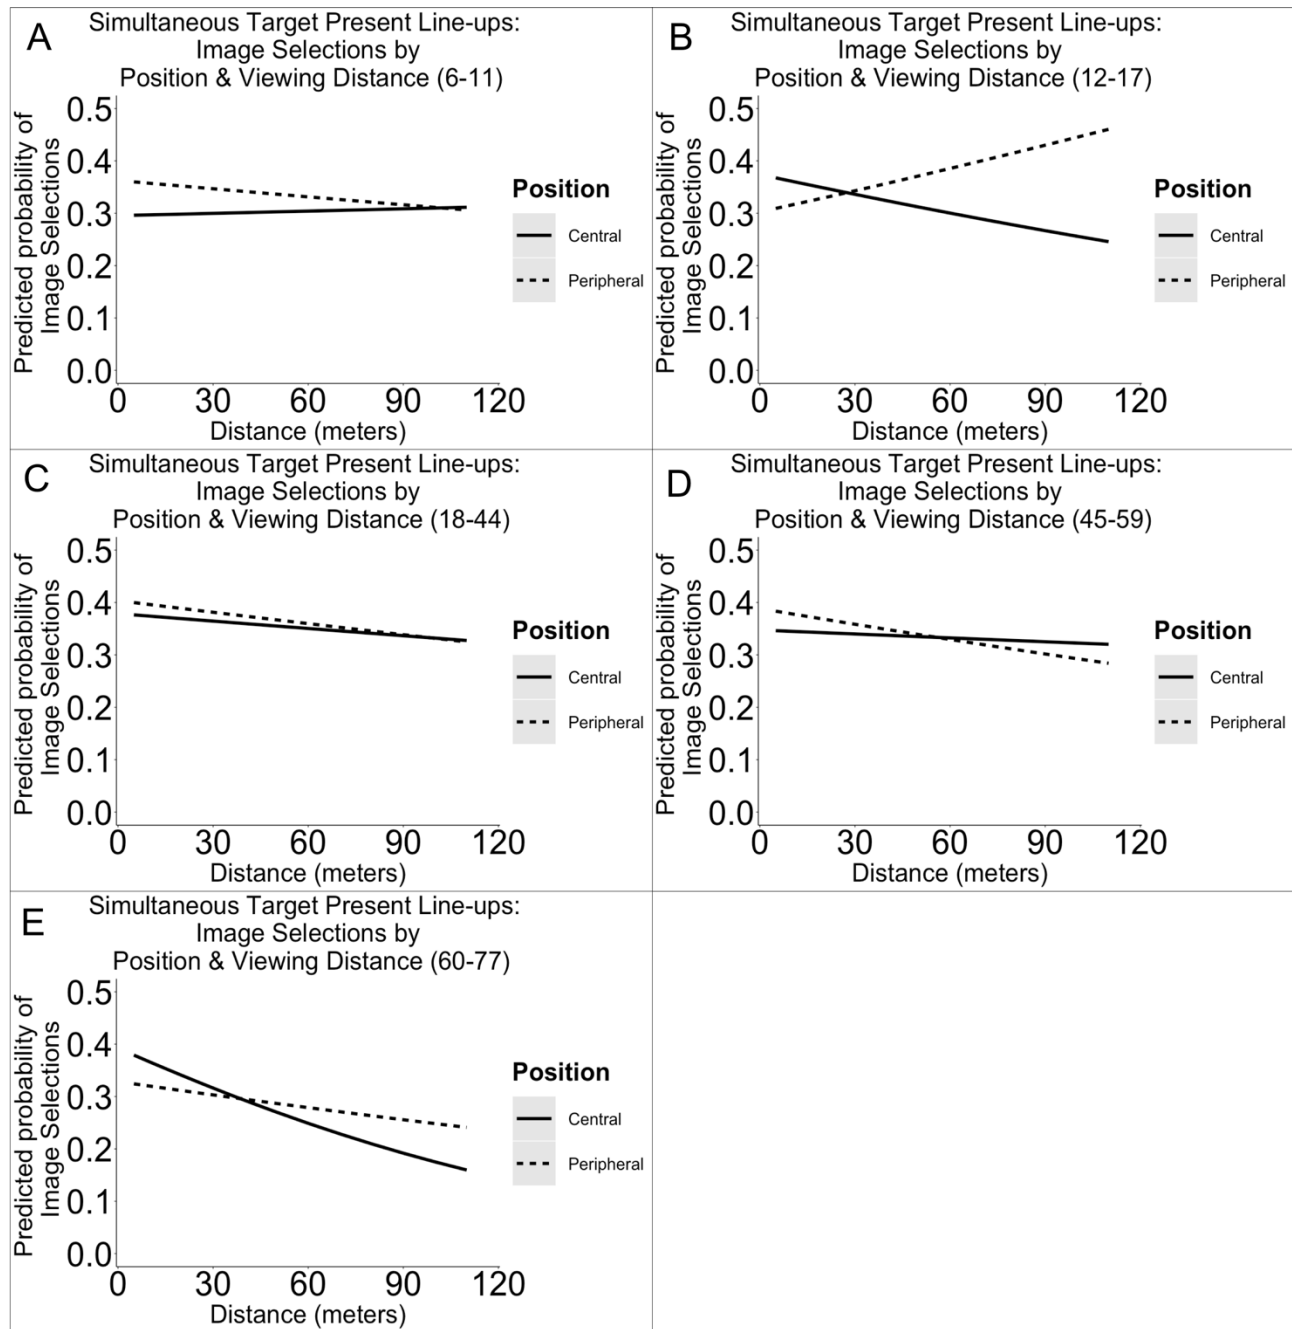

**Figure 1.** Illustration of the predicted probabilities of image selections in simultaneous target present line-ups per dichotomized line-up position (central versus peripheral), distance, and age group. Each panel represents the probabilities for a single age group: 6-11 (A), 12-17 (B), 18-44 (C), 45-59 (D), 60-77 (E).

## Line-up Image Positioning – Supplemental Material B

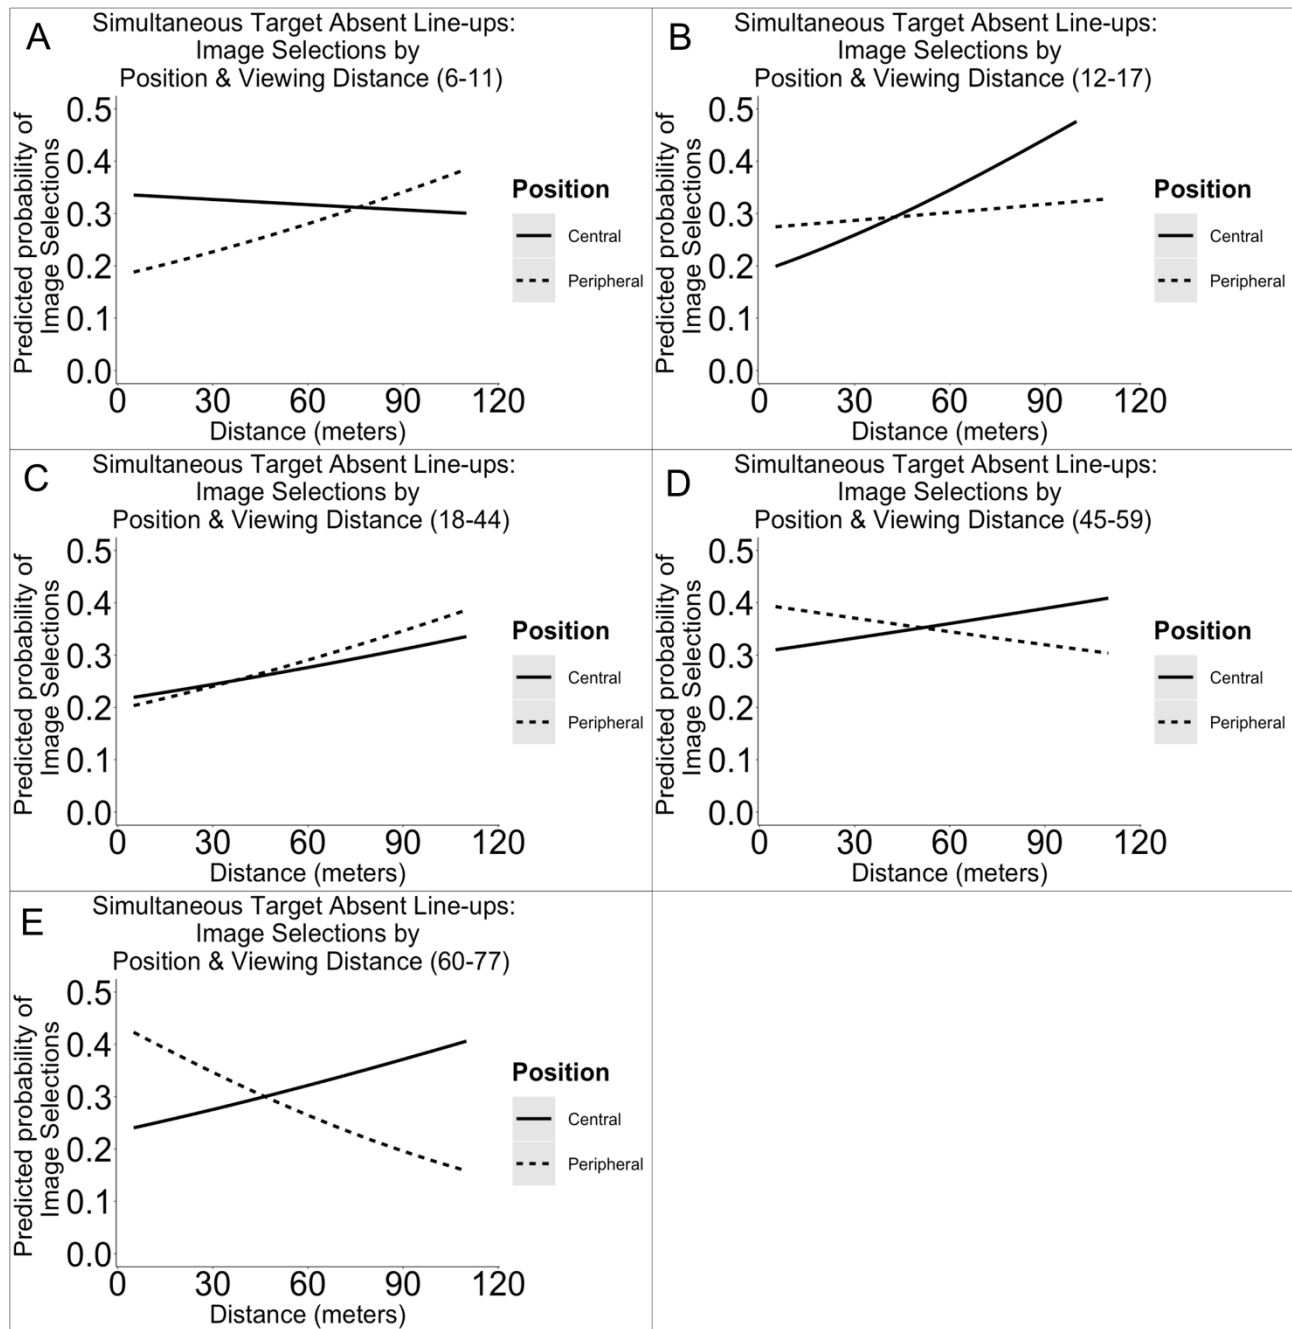

**Figure 2.** Illustration of the predicted probabilities of image selections in simultaneous target absent line-ups per dichotomized line-up position (central versus peripheral), distance, and age group. Each panel represents the probabilities for a single age group: 6-11 (A), 12-17 (B), 18-44 (C), 45-59 (D), 60-77 (E).

## Line-up Image Positioning – Supplemental Material B

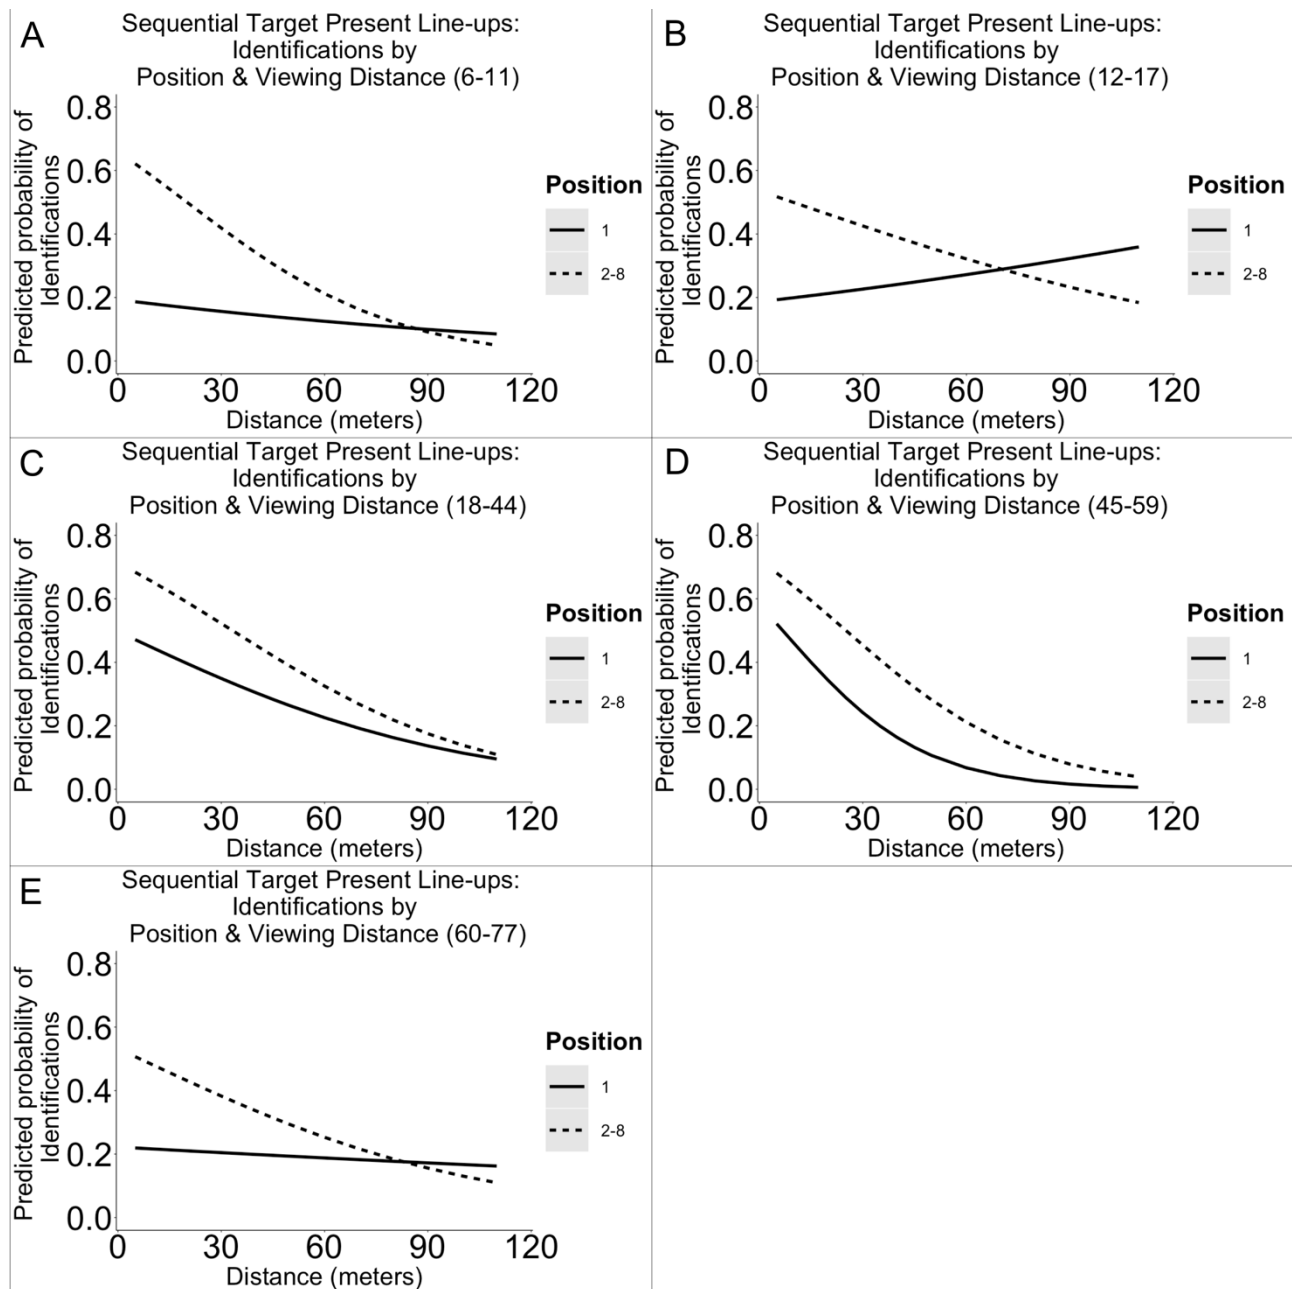

*Figure 3.* Illustration of the predicted probabilities of target identifications in sequential target present line-ups per dichotomized line-up position, distance, and age group. Each panel represents the probabilities for a single age group: 6-11 (A), 12-17 (B), 18-44 (C), 45-59 (D), 60-77 (E).

## Line-up Image Positioning – Supplemental Material B

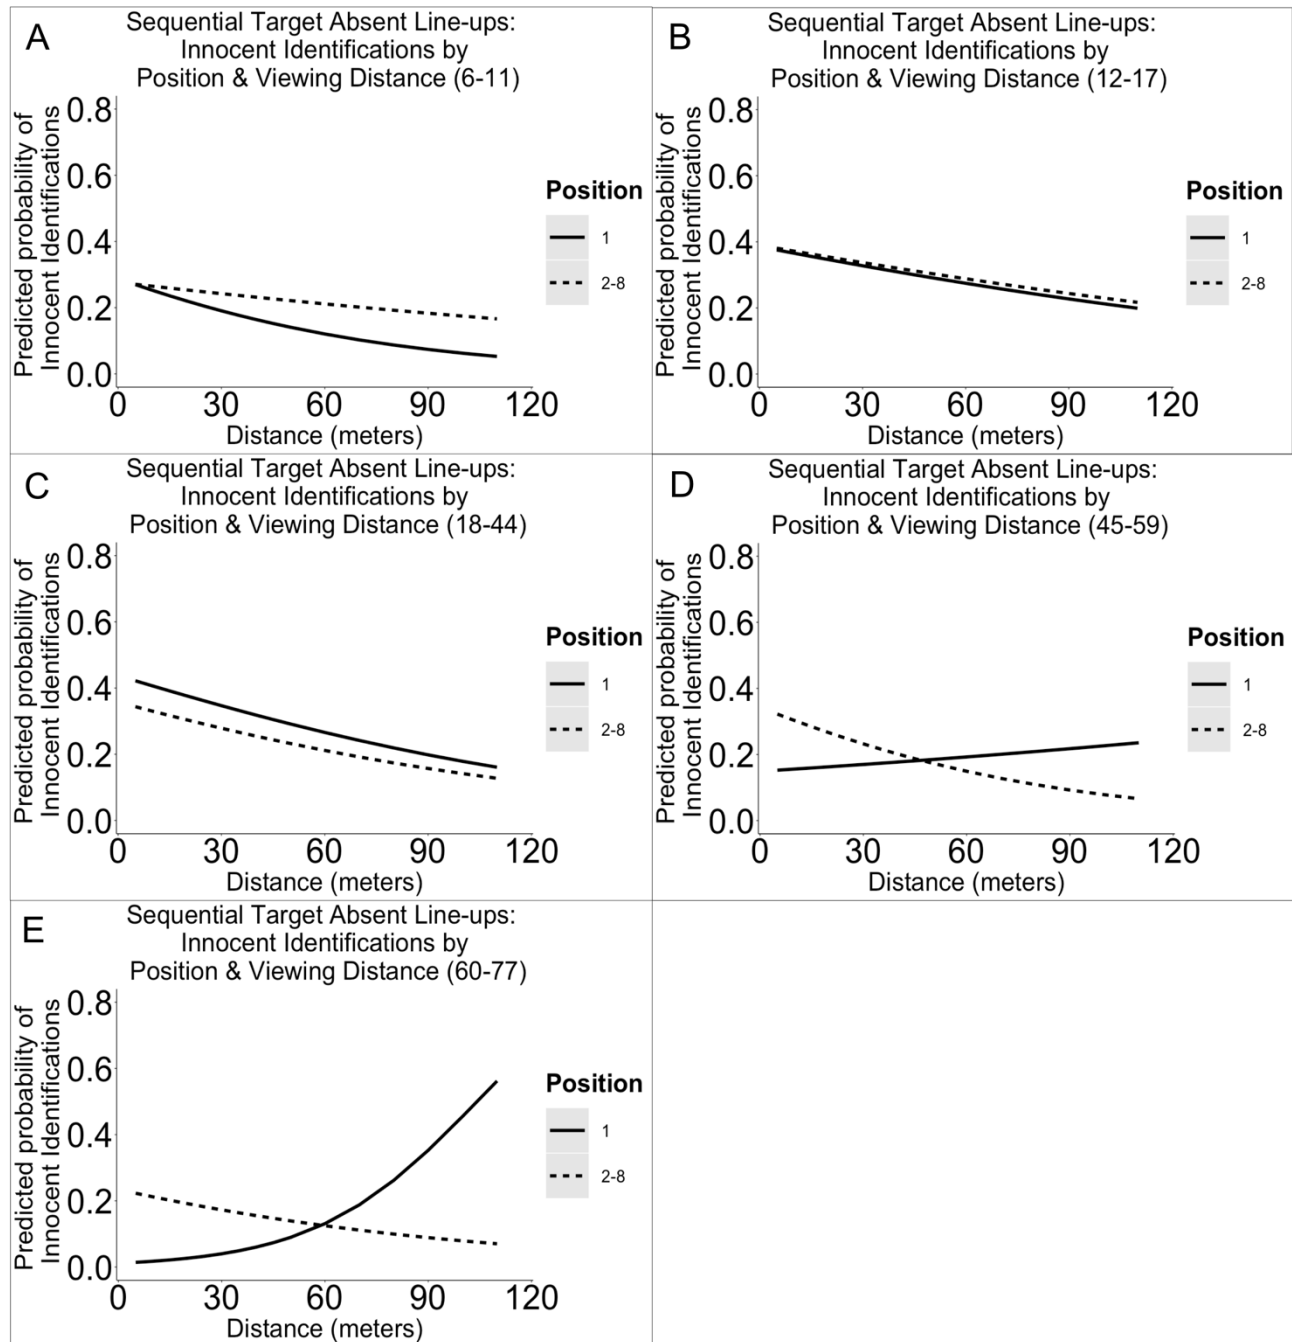

Figure 4. Illustration of the predicted probabilities of innocent identifications in sequential target absent line-ups per dichotomized line-up position, distance, and age group. Each panel represents the probabilities for a single age group: 6-11 (A), 12-17 (B), 18-44 (C), 45-59 (D), 60-77 (E).

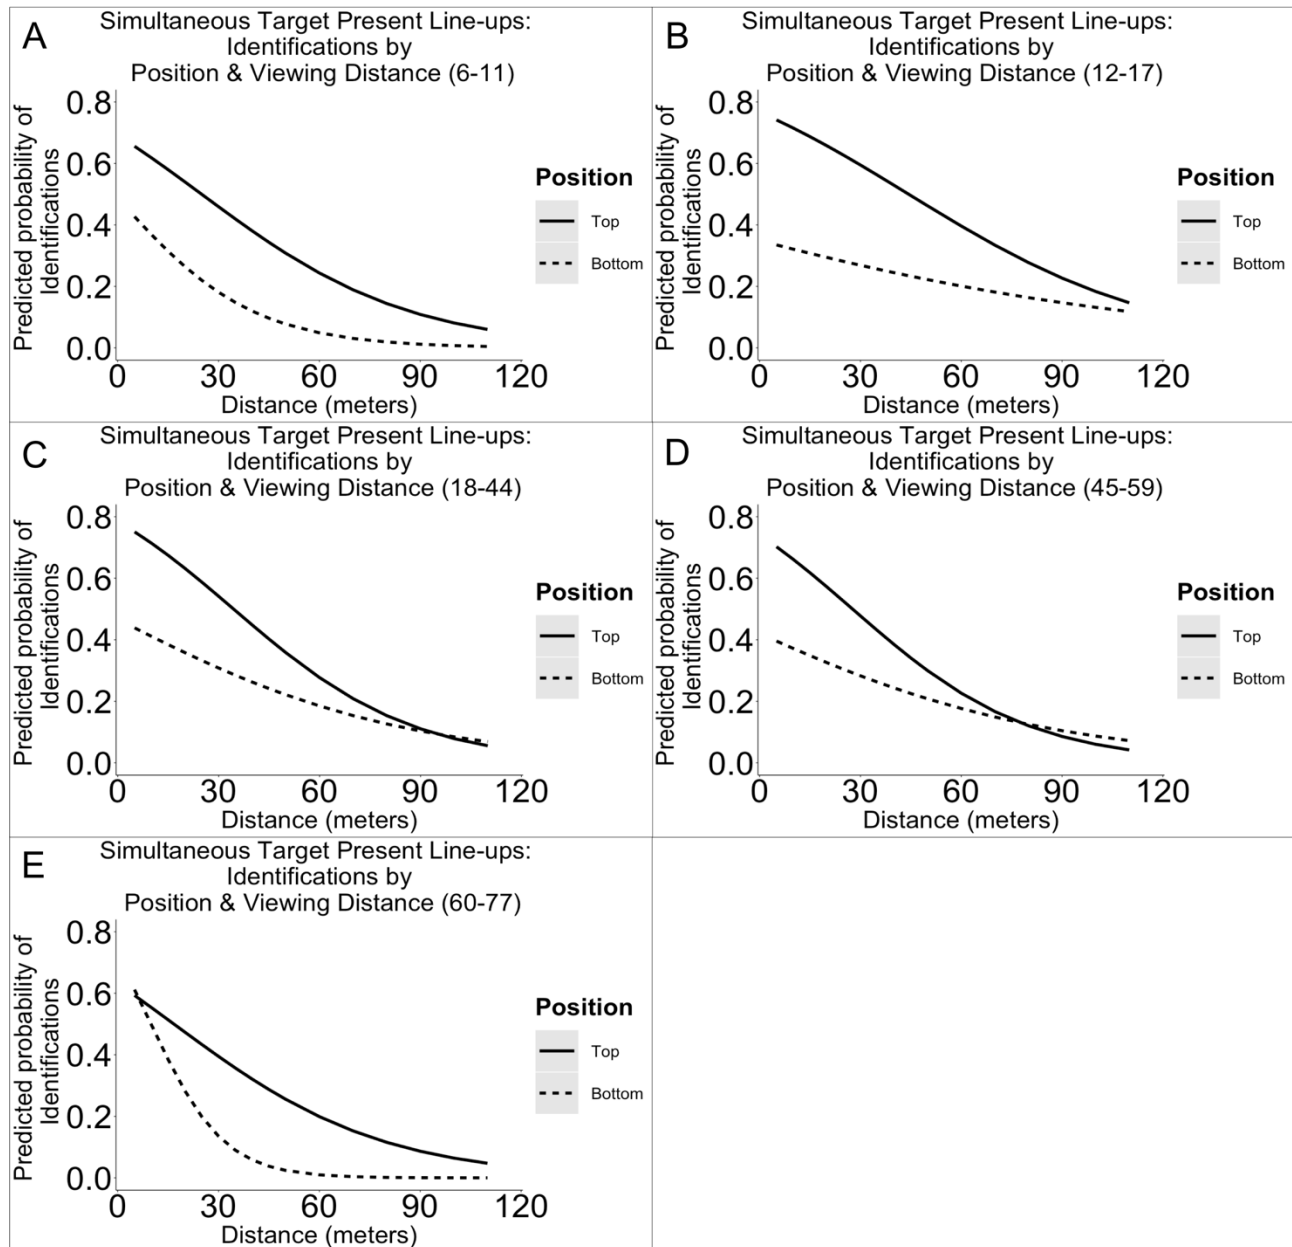

*Figure 5.* Illustration of the predicted probabilities of target identifications in simultaneous target present line-ups per dichotomized line-up position (top versus bottom), distance, and age group. Each panel represents the probabilities for a single age group: 6-11 (A), 12-17 (B), 18-44 (C), 45-59 (D), 60-77 (E).

## Line-up Image Positioning – Supplemental Material B

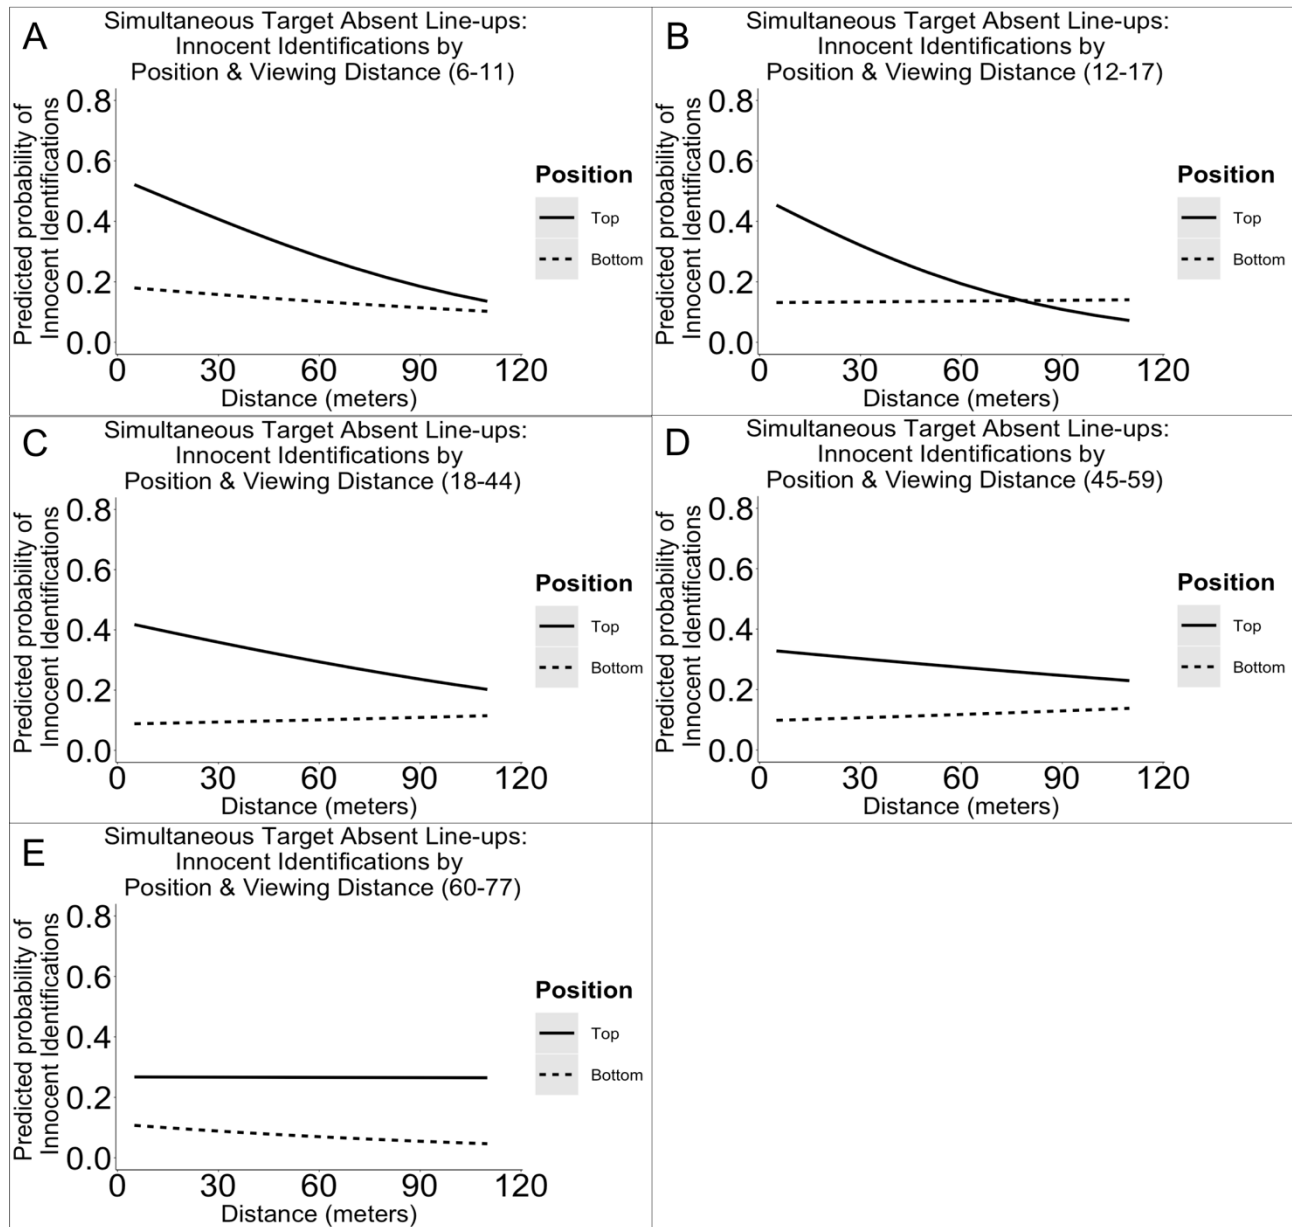

**Figure 6.** Illustration of the predicted probabilities of innocent identifications in simultaneous target absent line-ups per dichotomized line-up position (top versus bottom), distance, and age group. Each panel represents the probabilities for a single age group: 6-11 (A), 12-17 (B), 18-44 (C), 45-59 (D), 60-77 (E).

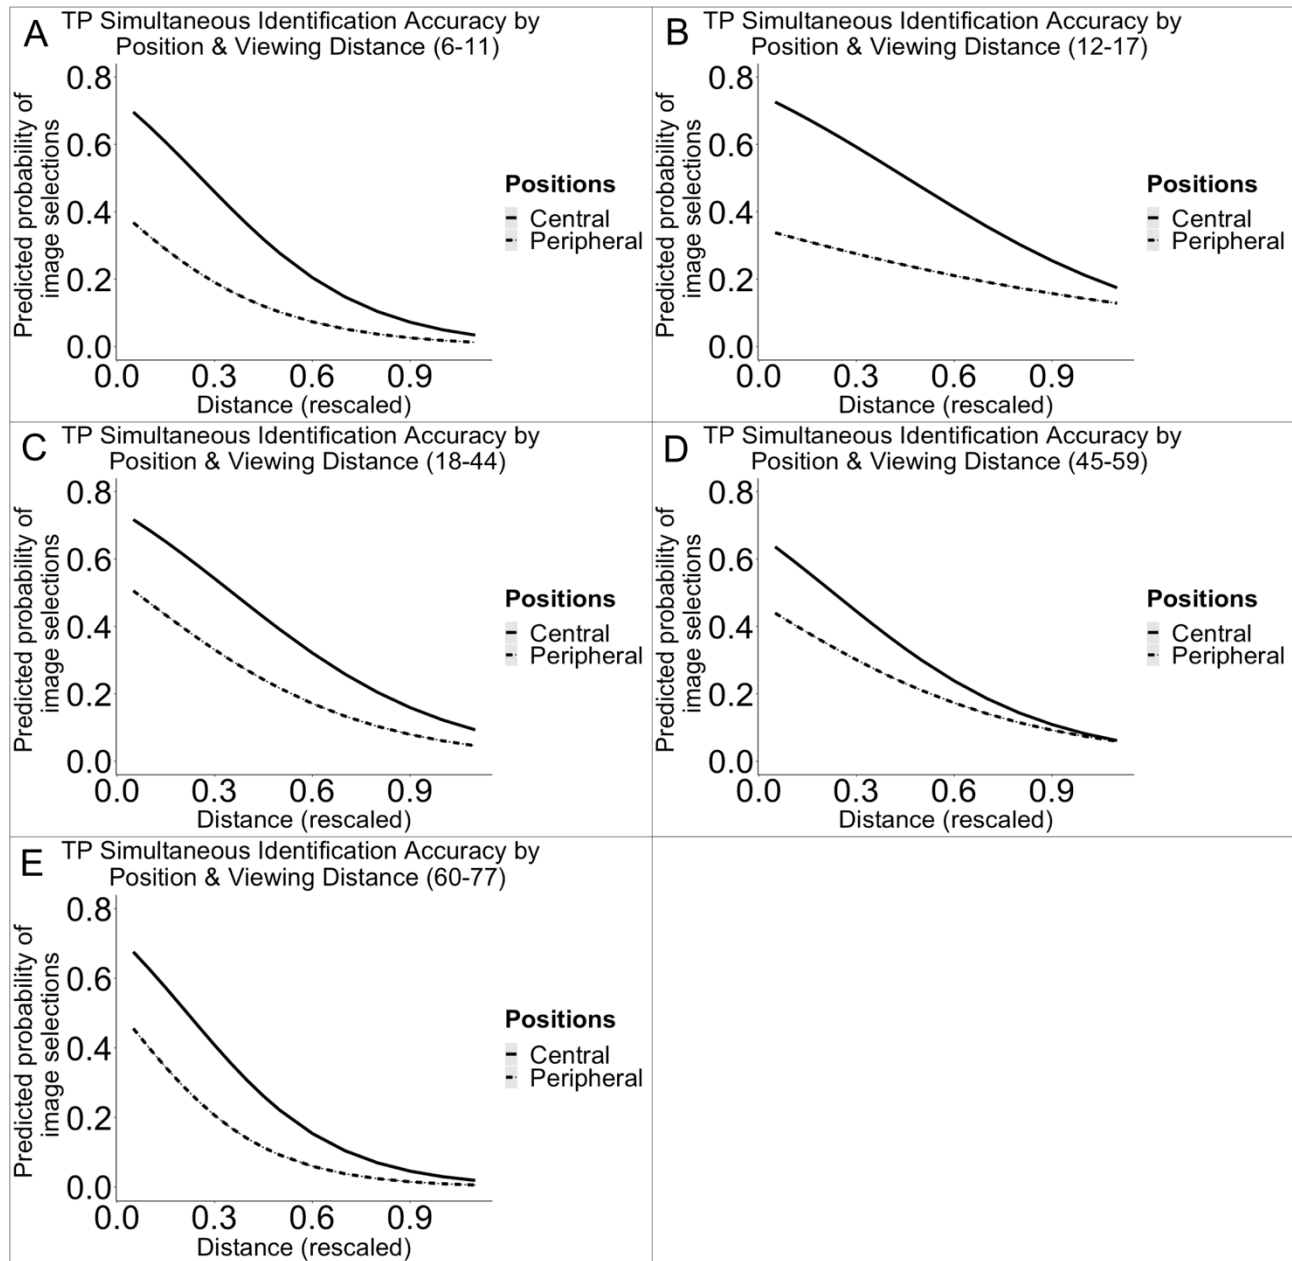

*Figure 7.* Illustration of the predicted probabilities of target identifications in simultaneous target present line-ups per dichotomized line-up position (central versus peripheral), distance, and age group. Each panel represents the probabilities for a single age group: 6-11 (A), 12-17 (B), 18-44 (C), 45-59 (D), 60-77 (E).

## Line-up Image Positioning – Supplemental Material B

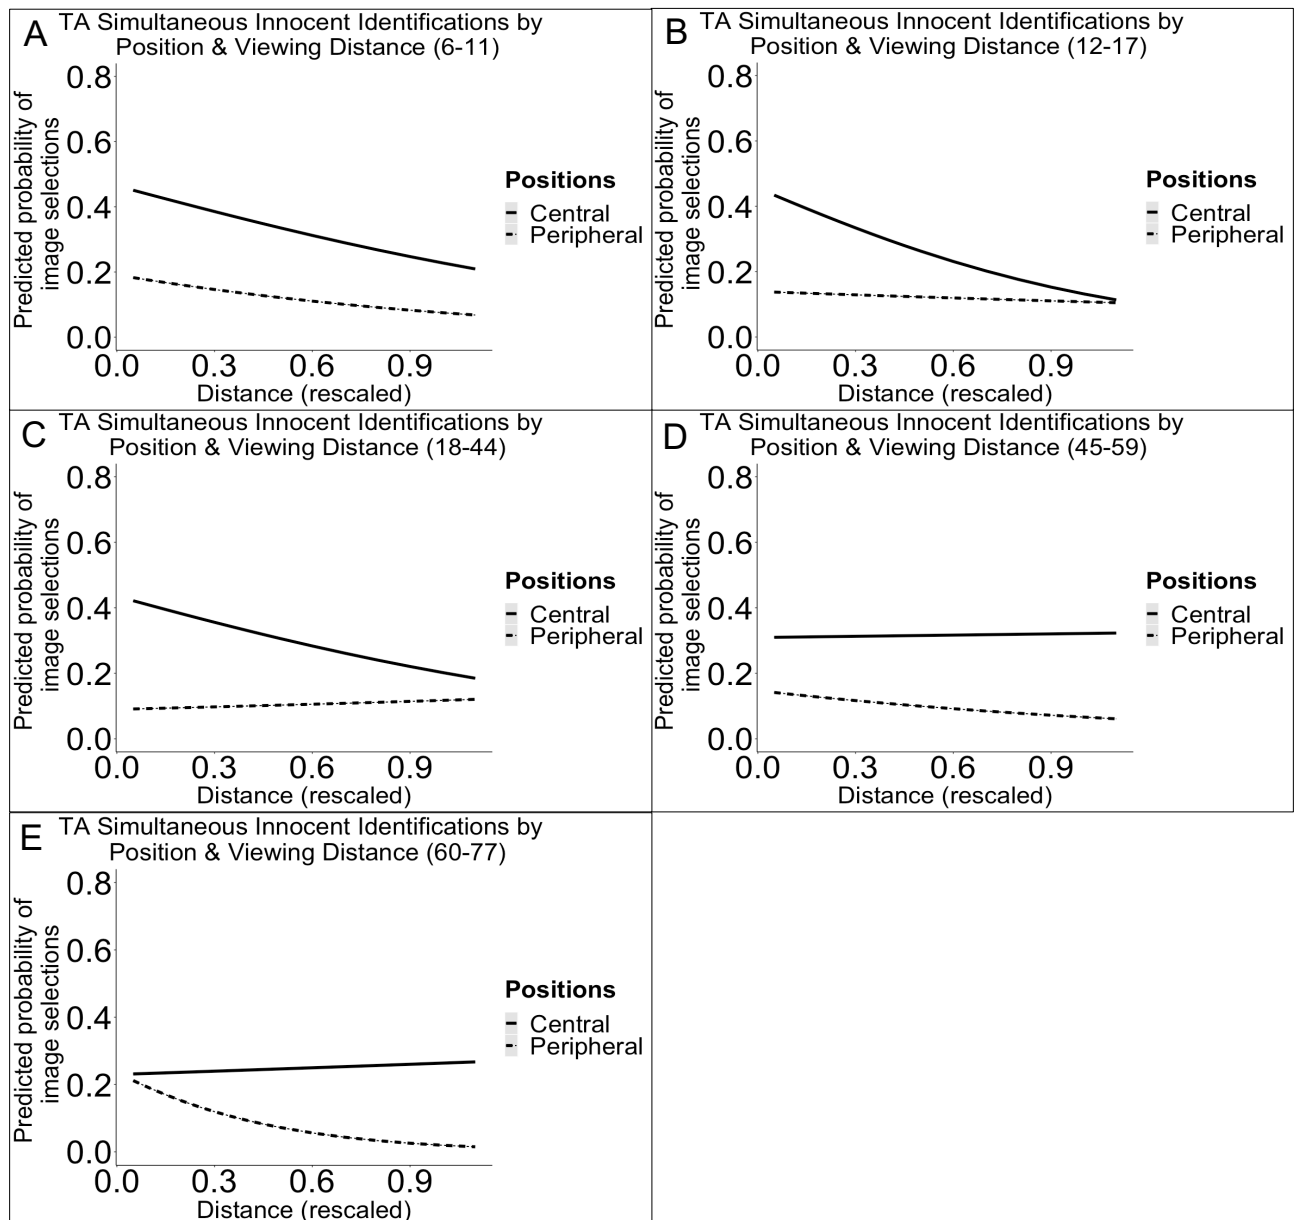

*Figure 8.* Illustration of the predicted probabilities of innocent identifications in simultaneous target absent line-ups per dichotomized line-up position (central versus peripheral), distance, and age group. Each panel represents the probabilities for a single age group: 6-11 (A), 12-17 (B), 18-44 (C), 45-59 (D), 60-77 (E).
